# Supplementary material for: Cbp1, a rapidly evolving fungal virulence factor, forms an effector complex that drives macrophage lysis
Source: bioRxiv or medRxiv preprint supplement (doi:10.1101/2021.09.16.459956), 2021-09-17

A.

Yps-3 Locus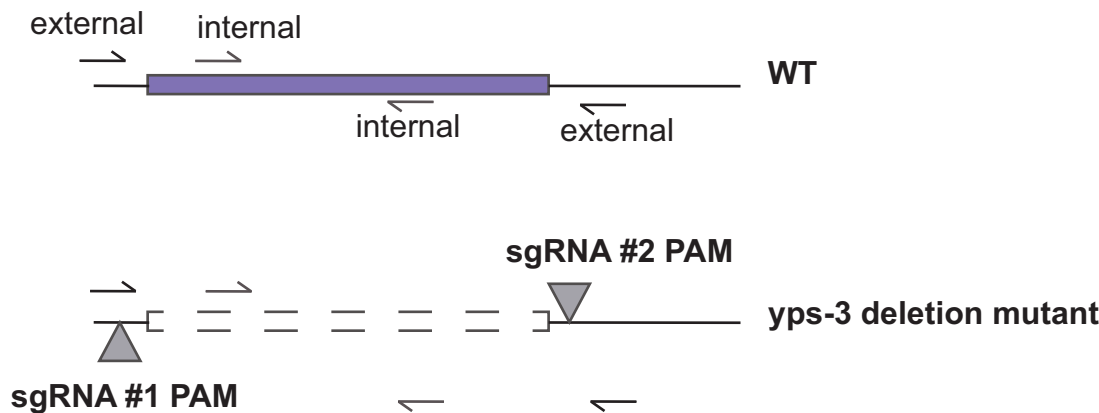

B.

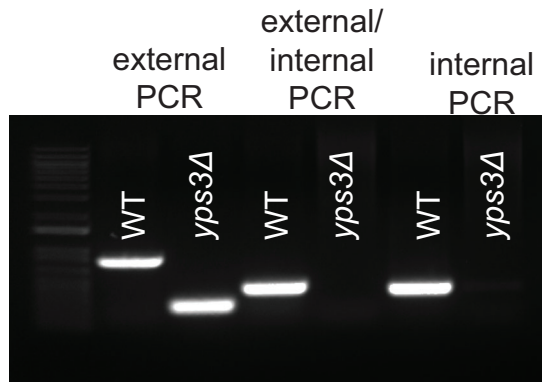

Supplement: Supplementary file [file media-1.pdf]
