# Supplementary material for: Cbp1, a rapidly evolving fungal virulence factor, forms an effector complex that drives macrophage lysis
Source: bioRxiv or medRxiv preprint supplement (doi:10.1101/2021.09.16.459956), 2021-09-17

G217B Cbp1

G186AR Cbp1

H88 Cbp1

Pb03 Cbp1

*E. crescens* Cbp1

*E. africanus* Cbp1

10 kDa

5 kDa

2 kDa

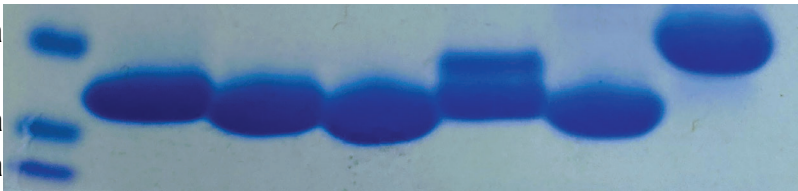

Supplement: Supplementary file [file media-2.pdf]
