# Supplementary material for: Cbp1, a rapidly evolving fungal virulence factor, forms an effector complex that drives macrophage lysis
Source: bioRxiv or medRxiv preprint supplement (doi:10.1101/2021.09.16.459956), 2021-09-17

**A.**

1:1 Input  
1:1 FT  
1:1 Elution  
1:2 Input  
1:2 FT  
1:2 Elution  
2:1 Input  
2:1 FT  
2:1 Elution  
5:1 Input  
5:1 FT  
5:1 Elution

20 kDa

15 kDa

10 kDa

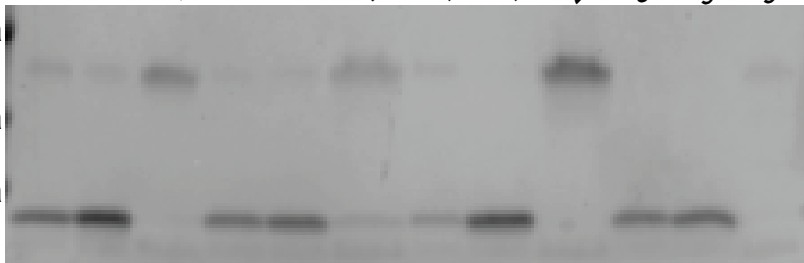

Supplement: Supplementary file [file media-8.pdf]
